# Supplementary material for: Automatic Recognition of Ragged Red Fibers in Muscle Biopsy from Patients with Mitochondrial Disorders
Source: MDPI journal article supplement (doi:10.3390/healthcare10030574), 2022-03-19
Supplement: s1 [file s1]

## Supplementary Materials:

**Table S1.** Clinical, histological, and molecular features of the nine patients.

|                           | Patient 1                                            | Patient 2                                             | Patient 3                              | Patient 4                                                            | Patient 5                                                       | Patient 6                                               | Patient 7                                 | Patient 8                              | Patient 9                                             |
|---------------------------|------------------------------------------------------|-------------------------------------------------------|----------------------------------------|----------------------------------------------------------------------|-----------------------------------------------------------------|---------------------------------------------------------|-------------------------------------------|----------------------------------------|-------------------------------------------------------|
| Sex                       | M                                                    | M                                                     | F                                      | F                                                                    | M                                                               | M                                                       | F                                         | M                                      | F                                                     |
| Age at muscle biopsy      | 5 yrs                                                | 11 yrs                                                | 41 yrs                                 | 8 yrs                                                                | 60 yrs                                                          | 3 months                                                | 46 yrs                                    | 67 yrs                                 | 58 yrs                                                |
| Clinical features         | Cardiomyopathy, myopathy                             | Retinitis pigmentosa, ptosis, ataxia, hearing loss    | Cardiomyopathy, hearing loss, diabetes | Retinitis pigmentosa, hearing loss, diabetes, psychomotor regression | Ophthalmoplegia                                                 | Hypotonia, severe metabolic acidosis                    | Ptosis, decreased visual acuity           | Ophthalmoplegia                        | Ophthalmoplegia                                       |
| Histology                 | RRFs; subsarcolemmal rims, lipid storage             | RRFs, COX-negative SDH-positive fibers, lipid storage | RRFs, COX-negative SDH-positive fibers | RRFs, COX-negative SDH-positive fibers, lipid storage                | Variation in fiber size, RRFs, COX-negative SDH-positive fibers | RRFs, diffuse reduced COX staining, SDH-positive fibers | RRFs, COX-negative SDH-positive fibers    | RRFs, COX-negative SDH-positive fibers | RRFs, COX-negative SDH-positive fibers, lipid storage |
| Number of analysed images | 2                                                    | 4                                                     | 6                                      | 5                                                                    | 5                                                               | 2                                                       | 2                                         | 6                                      | 5                                                     |
| Mutation                  | ACAD9 c.170C>T (p.Pro57Leu)+ c.1240C>T (p.Arg414Cys) | 8 Kb mtDNA single deletion                            | m.5522G>A MT-TW (tRNA <sup>Trp</sup> ) | 7 Kb mtDNA single deletion                                           | mtDNA common deletion                                           | Muscular mtDNA depletion                                | OPA1 c.124C>T (p.H42Y)                    | mtDNA common deletion                  | 5 Kb mtDNA single deletion                            |
| Diagnosis                 | Mitochondrial Cardiomyopathy                         | Kearns-Sayre syndrome                                 | Encephalomyopathy                      | Kearns-Sayre syndrome                                                | CPEO                                                            | Mitochondrial DNA depletion syndrome                    | DOA, dominant optic atrophy plus syndrome | CPEO                                   | CPEO                                                  |

Abbreviation: M, man; F, woman; CPEO, chronic progressive external ophthalmoplegia; RRFs, ragged red fibers; COX, cytochrome c oxidase.; SDH, succinate dehydrogenase, mtDNA, mitochondrial DNA.

**Table S2.** Hyperparameters values for each model after the tuning operation.

|     | Waste-tissue classification                                                                                    | Ragged – not ragged classification                                                                              |
|-----|----------------------------------------------------------------------------------------------------------------|-----------------------------------------------------------------------------------------------------------------|
| RF  | min size of nodes: 15<br>number of trees: 625<br>number of variables: 9<br>priors of the classes: 0.487, 0.316 | min size of nodes: 19<br>number of trees: 1466<br>number of variables: 4<br>priors of the classes: 0.322, 0.792 |
| GBM | distribution: adaboost                                                                                         | distribution: adaboost                                                                                          |

|     |                                                                                                                                  |                                                                                                                                   |
|-----|----------------------------------------------------------------------------------------------------------------------------------|-----------------------------------------------------------------------------------------------------------------------------------|
|     | <b>number of trees:</b> 300<br><b>shrinkage:</b> 0.483373<br><b>fraction selected:</b> 0.630<br><b>fraction for train:</b> 0.946 | <b>number of trees:</b> 173<br><b>shrinkage:</b> 0.0540611<br><b>fraction selected:</b> 0.514<br><b>fraction for train:</b> 0.988 |
| SVM | <b>kernel:</b> radial<br><b>degree:</b> -<br><b>gamma:</b> 0.01572429<br><b>coef0:</b> -<br><b>cost:</b> 5.31966                 | <b>kernel:</b> radial<br><b>degree:</b> -<br><b>gamma:</b> 0.01732987<br><b>coef0:</b> -<br><b>cost:</b> 4.905418                 |

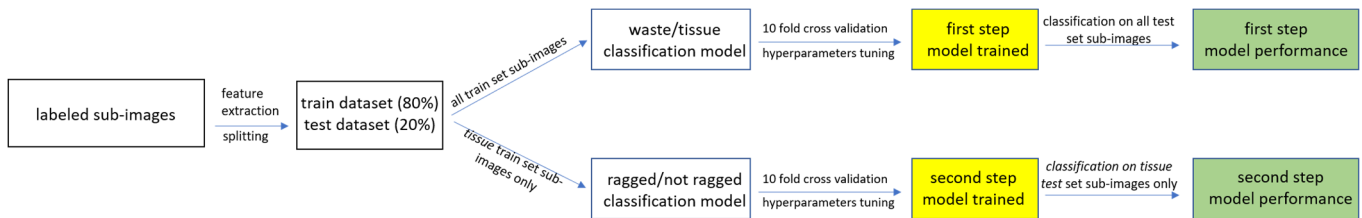

**Figure S1:** protocol used to select the model with the best overall fit for both classification steps.
